# Supplementary material for: Haptoglobin buffers lipopolysaccharides to delay activation of NFκB
Source: PubMed Central journal article supplement (PMC11479958; doi:10.3389/fimmu.2024.1401527), 2024-10-02
Supplement: Presentation1.pdf [file Presentation1.pdf]

# Supplementary Data Zein *et al.*

RNA-seq data and associated experimental and bioinformatic details are deposited at Gene Expression Omnibus ( GSE215916 ).

Induction of NF- $\kappa$ B signaling by HP –  
Kinetics of I $\kappa$ B $\alpha$  degradation  
Donor 1

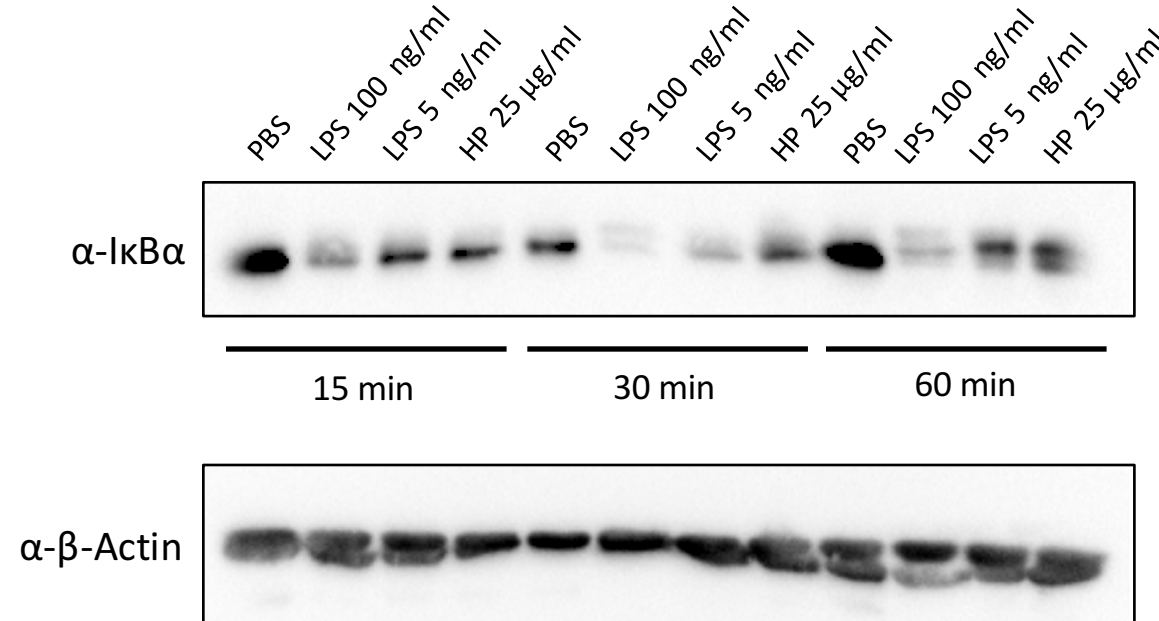

The upper band represents phosphorylated I $\kappa$ B $\alpha$ .

Induction of NF- $\kappa$ B signaling by HP –  
Kinetics of I $\kappa$ B $\alpha$  degradation  
Donor 2

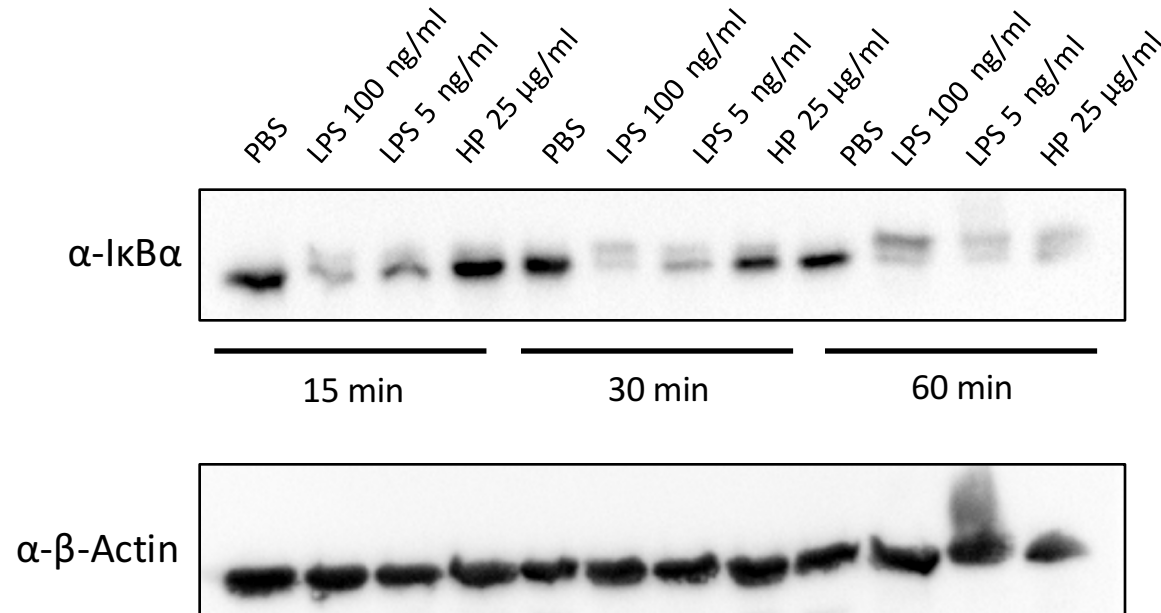

The upper band represents phosphorylated I $\kappa$ B $\alpha$ .

Induction of NF- $\kappa$ B signaling by HP –  
Kinetics of I $\kappa$ B $\alpha$  degradation  
Donor 3

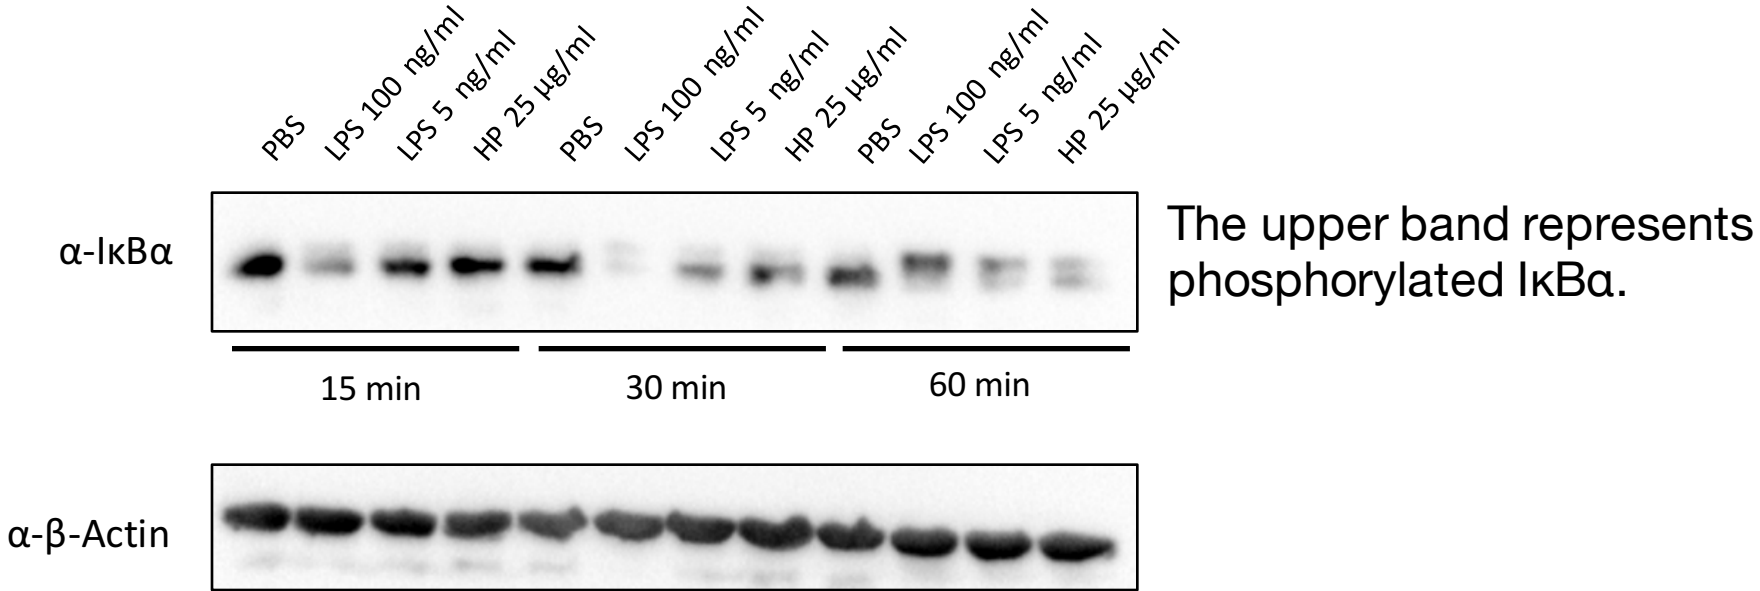

Induction of NF- $\kappa$ B signaling by HP –  
Kinetics of I $\kappa$ B $\alpha$  degradation  
Donor 4

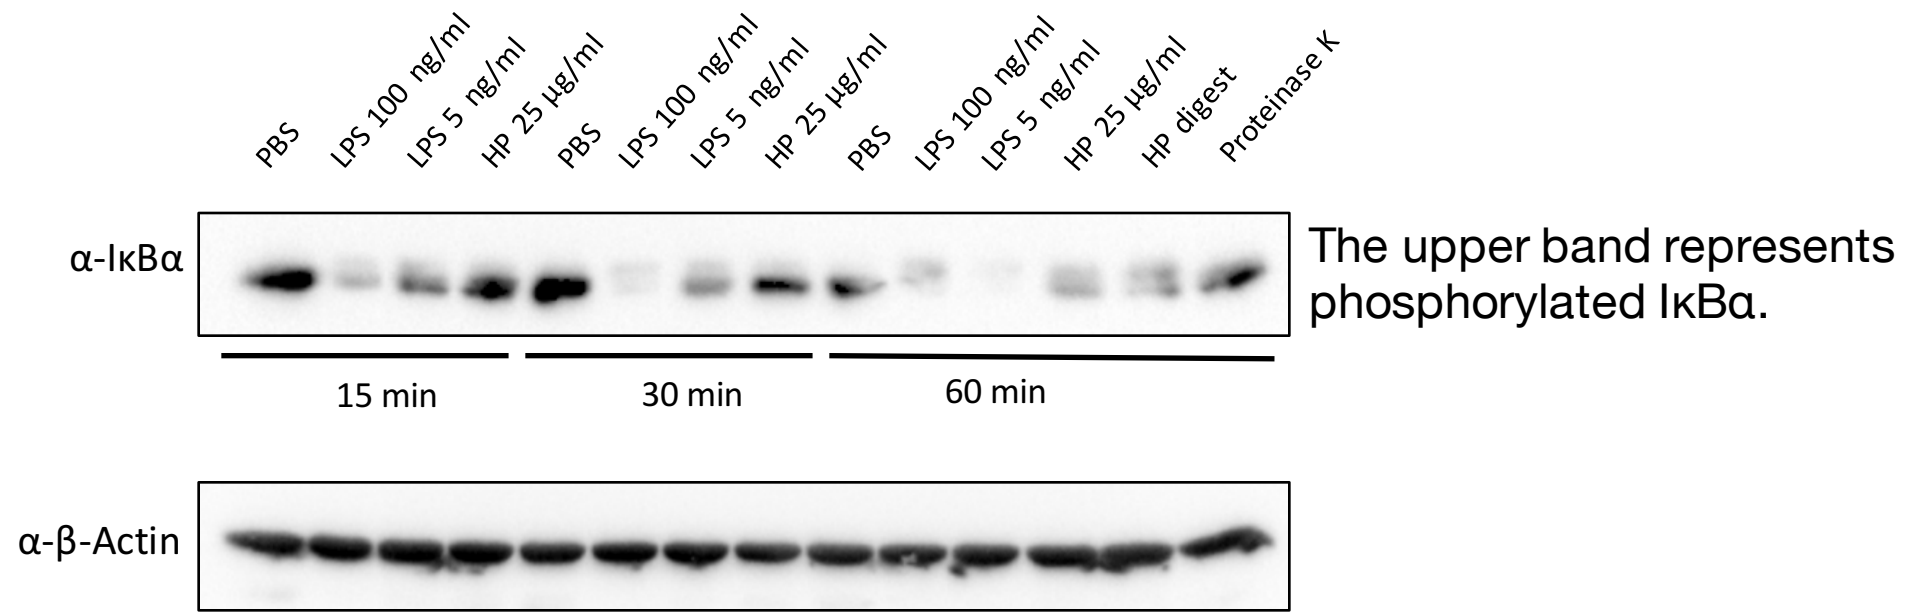



Induction of NF- $\kappa$ B signaling by HP –  
Kinetics of I $\kappa$ B $\alpha$  degradation  
Donor 5

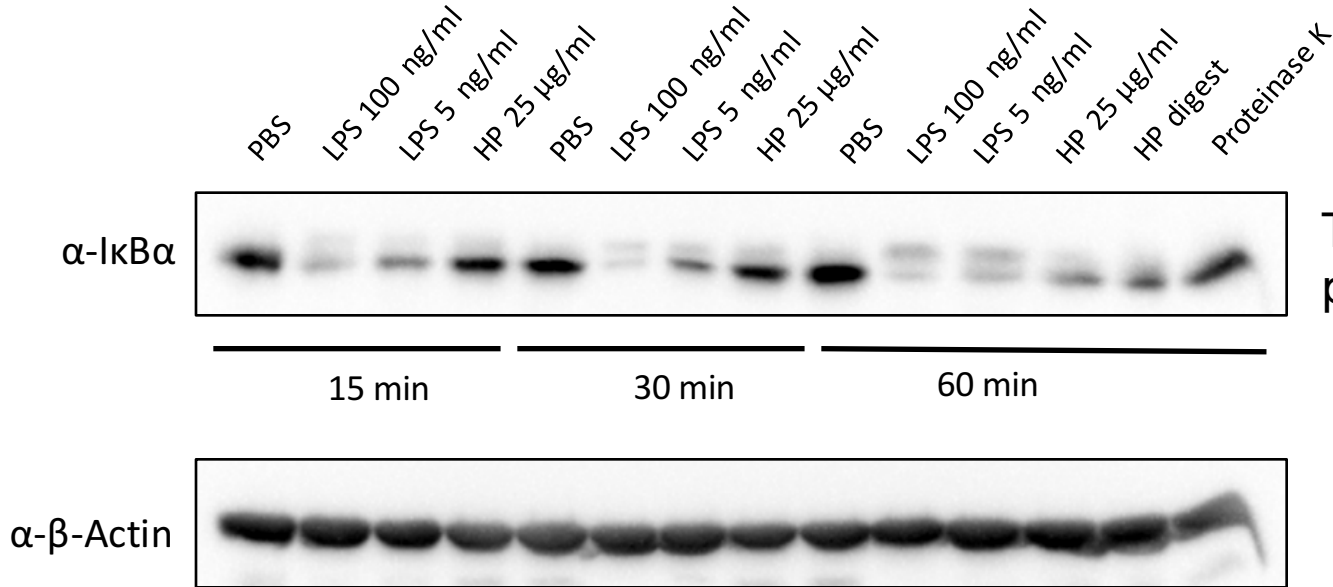

The upper band represents phosphorylated I $\kappa$ B $\alpha$ .
